# Supplementary material for: Inhibition of EZH2 induces NK cell-mediated differentiation and death in muscle-invasive bladder cancer
Source: PubMed Central journal article supplement (PMC6748105; doi:10.1038/s41418-019-0278-9), 2019-01-28
Supplement: 41418_2019_278_MOESM1_ESM.pdf [file 41418_2019_278_MOESM1_ESM.pdf]

**Supplementary Figure 1 Mutations and gene expression alterations in KDM6A and SWI/SNF complex affect overall and progression-free survival in muscle-invasive bladder cancer dataset in The Cancer Genome Atlas (TCGA).**

**(A).** Oncoprint from TCGA (n=412) shows the percent of MIBC patients affected by mutations or mRNA alterations in EZH2, KDM6A and members of the SWI/SNF complex. **(B).** MIBC patients with loss of function mutations or mRNA downregulation in KMD6A or SWI/SNF complex genes present with worse overall survival and significantly reduced progression-free survival compared with patients with no alterations. EZH2 amplification and/or mRNA overexpression patients have shorter overall and progression-free survival compared to MIBC patients with no EZH2 alterations.

**Supplementary Figure 2 EZH2 inhibition and cisplatin treatment alter H3K27me3 levels in bladder cancer cells.**

**(A).** H3K27me3 levels are reduced in HT1376, T24 and UM-UC-3 cells treated with EPZ011989 for 4 days. Total H3 is used as a loading control. **(B).** H3K27me3 levels are increased with 48 hours of cisplatin treatment. Total H3 is used as a loading control.

**Supplementary figure 3 EZH2 inhibitor reduces tumor proliferation *in vivo*.**

**(A).** The treatment schedule did not affect the body weight of nude mice. The Y-axis represents body weight in grams, and the X-axis represents the number of treatment days. Error bars represent standard error of means of all the mice in each group. **(B)- (E).** Graphs represent tumor volumes of individual mice in each treatment group. The Y-axis represents tumor volume in mm<sup>3</sup>, and the X-axis represents the number of treatment days.

**Supplementary Figure 4 RNA-sequencing of EZH2 treated cells and tumors revealed alteration of large number of gene transcripts.**

**(A)-(D).** Venn diagrams show the number of transcripts that are altered in the short term EZH2 inhibitor studies *in vitro* and long-term xenograft studies *in vivo*.

**Supplementary Figure 5 mRNA upregulation of at least one transcript associated with NK cell activation is associated with increased overall and progression-free survival in the TCGA MIBC cohort.**

**(A).** Oncoprint from TCGA (n=412) shows the percent of MIBC patients affected by mutations or mRNA alterations that are related to NK cell activation. **(B).** MIBC patients with mRNA upregulation in any of the listed genes present with better overall and progression-free survival compared with patients with no alterations.

**Supplementary Figure 6 Short-term EZH2 knockdown and cisplatin treatment alter markers of cells with pluripotent potential.**

**(A)** HT1376, T24 and UM-UC-3 cells treated with EPZ011989 (1 $\mu$ M) for 4 days show reduced expression of ALDH2 and CK5 compared to vehicle treated cells. The numbers below the bands represent semi-quantitative analysis of band intensities using Image J. The numbers are normalized to tubulin (loading control) and to vehicle treatments. **(B)-**  
**(C).** EZH2 knockdown using short interference RNA reduces the levels of EZH2 as well as its target H3K27me3 levels. GAPDH and total Histone H3 are used as loading control. **(D).** EZH2 knockdown with short interference RNA reduces CK5 and ALDH2 levels. Tubulin is used as loading control. The numbers below the bands represent a semi-quantitative analysis of band intensities using Image J. The numbers are

normalized to tubulin (loading control) and vehicle treatments. **(E)**. HT1376, T24 and UM-UC-3 cells treated with Cisplatin (0.25 µg/ml) for 48 hours showed increased ALDH2 and CK5 expression compared to vehicle-treated cells. The numbers below the bands represent a semi-quantitative analysis of band intensities using Image J. The numbers are normalized to tubulin (loading control) and vehicle treatments.

**Supplementary Figure 7 mRNA upregulation of at least one transcript associated with pluripotency is associated with reduced overall and progression-free survival in the TCGA MIBC cohort**

**(A)**. Oncoprint from TCGA (n=412) shows the percent of MIBC patients affected by mutations or mRNA alterations in genes that are associated with pluripotency potential.

**(B)**. MIBC patients with mRNA upregulation in any of the listed genes present with worse overall and progression-free survival compared with patients with no alterations.

**Supplementary Table 1** lists the types of mutations found in KDM6A and SWI/SNF complex members found in the RPCCC cohort

**Supplementary Table 2** Mutations in HT1376, T24 and UM-UC-3 cells

**Supplementary Table 3** p-values for *in vitro* experiments

**Supplementary Table 4** p-values for *in vivo* experiments

**Supplementary Table 5** EZH2 inhibition mediated upregulated transcripts single agent EPZ011989 and combination treated HT1376 xenografts *in vivo*

**Supplementary Table 6** EZH2 inhibition mediated upregulated transcripts in HT1376 cells *in vitro*

**Supplementary Table 7** EZH2 inhibition mediated upregulated transcripts in T24 cells  
*in vitro*

**Supplementary Table 8** EZH2 inhibition mediated common upregulated transcripts in  
HT1376 and T24 cells *in vitro*

**Supplementary Table 9** EZH2 inhibition mediated common upregulated transcripts in  
HT1376 *in vitro* and HT1376 xenografts *in vivo*

Supplementary Figure 1 Mutations and gene expression alterations in KDM6A and SWI/SNF complex affect overall and progression-free survival in muscle-invasive bladder cancer dataset in The Cancer Genome Atlas (TCGA)

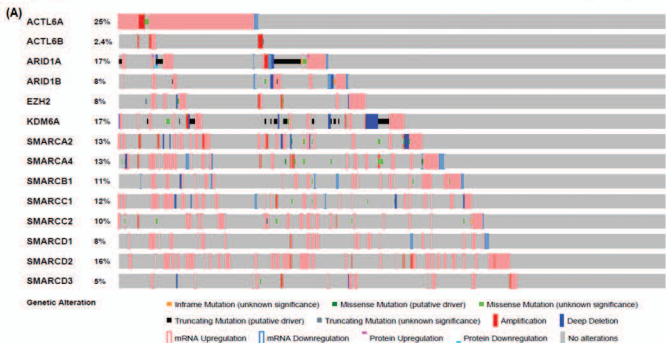

(B)

| Overall survival (p=0.363)                                                                       | Number of Cases, Total | Number of Cases, Deceased            | Median Months Survival     |
|--------------------------------------------------------------------------------------------------|------------------------|--------------------------------------|----------------------------|
| Cases with at least one nonsense mutation or mRNA downregulation in selected genes (except EZH2) | 36                     | 16                                   | 30.91                      |
| Cases without any alterations                                                                    | 114                    | 48                                   | 61.4                       |
| <b>Progression-free survival (p=0.034)</b>                                                       |                        |                                      |                            |
|                                                                                                  | Number of Cases, Total | Number of Cases, Relapsed/Progressed | Median Months Disease-free |
| Cases with at least one nonsense mutation or mRNA downregulation in selected genes (except EZH2) | 30                     | 18                                   | 17.35                      |
| Cases without any alterations                                                                    | 87                     | 31                                   | 87.48                      |
| <b>Overall survival (p=0.868)</b>                                                                |                        |                                      |                            |
|                                                                                                  | Number of Cases, Total | Number of Cases, Deceased            | Median Months Survival     |
| Cases with EZH2 amplification or overexpression                                                  | 26                     | 13                                   | 28.38                      |
| Cases without any alterations                                                                    | 379                    | 167                                  | 33.11                      |
| <b>Progression-free survival (p=0.428)</b>                                                       |                        |                                      |                            |
|                                                                                                  | Number of Cases, Total | Number of Cases, Relapsed/Progressed | Median Months Disease-free |
| Cases with EZH2 amplification or overexpression                                                  | 23                     | 14                                   | 27.83                      |
| Cases without any alterations                                                                    | 295                    | 128                                  | 32.59                      |



Supplementary figure 3 EZH2 inhibitor reduces tumor proliferation *in vivo*

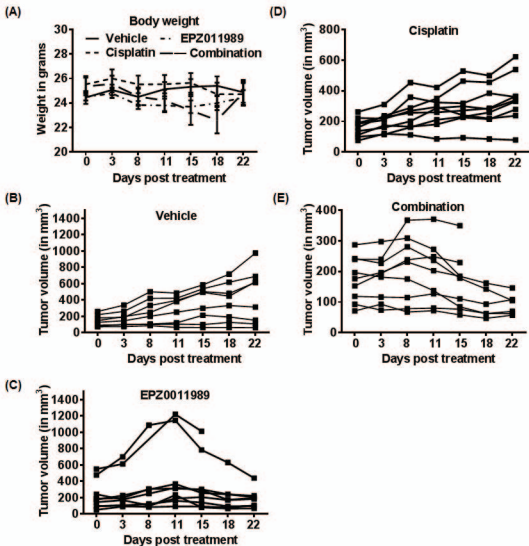

Supplementary Figure 4 RNA-sequencing of EZH2 treated cells and tumors revealed alteration of large number of gene transcripts

(A)

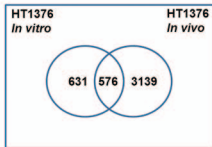

(B)

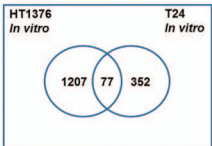

(C)

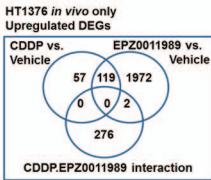

(D)

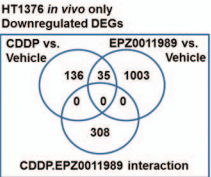



Supplementary Figure 5 mRNA upregulation of at least one transcript associated with NK cell activation is associated with increased overall and progression-free survival in the TCGA MIBC cohort

(A)

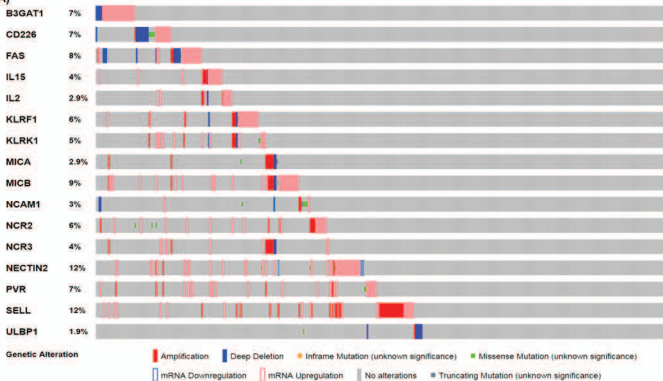

(B)

| Overall survival (p=0.477)                                  | Number of Cases, Total | Number of Cases, Deceased            | Median Months Survival     |
|-------------------------------------------------------------|------------------------|--------------------------------------|----------------------------|
| Cases with at least one mRNA upregulation in selected genes | 173                    | 74                                   | 41.72                      |
| Cases without any alterations                               | 176                    | 82                                   | 32                         |
| <b>Progression-free survival (p=0.320)</b>                  |                        |                                      |                            |
|                                                             | Number of Cases, Total | Number of Cases, Relapsed/Progressed | Median Months Disease-free |
| Cases with at least one mRNA upregulation in selected genes | 136                    | 58                                   | 37.78                      |
| Cases without any alterations                               | 137                    | 65                                   | 27.99                      |

Supplementary Figure 6 Short term EZH2 knockdown and cisplatin treatment alters markers of cells with pluripotent potential

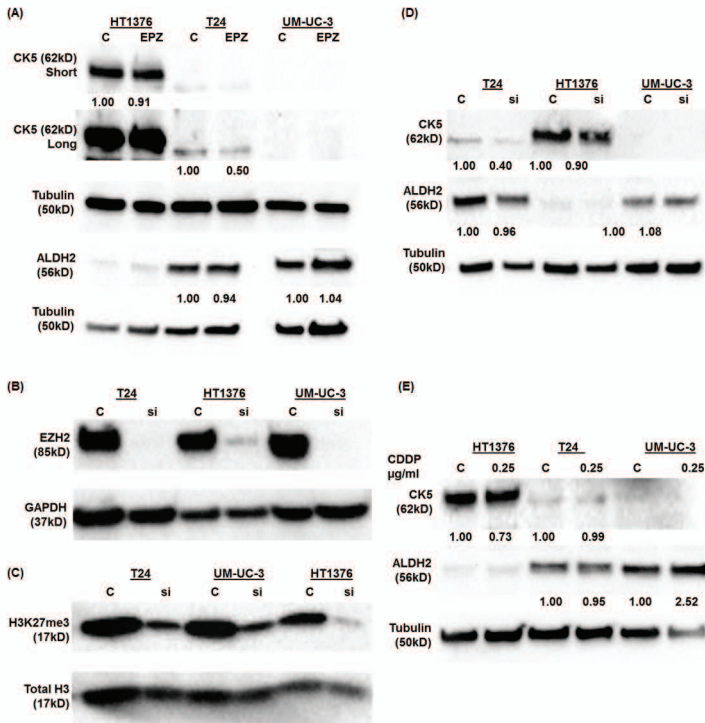

**Supplementary Figure 7 mRNA upregulation of at least one transcript associated with pluripotency is associated with reduced overall and progression-free survival in the TCGAMIBC cohort**

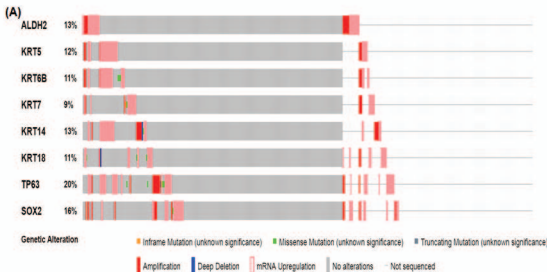

**(B)**

| <b>Overall survival (p=0.744)</b>                           | <b>Number of Cases, Total</b> | <b>Number of Cases, Deceased</b>            | <b>Median Months Survival</b>     |
|-------------------------------------------------------------|-------------------------------|---------------------------------------------|-----------------------------------|
| Cases with at least one mRNA upregulation in selected genes | 125                           | 55                                          | 27.43                             |
| Cases without any alterations                               | 268                           | 116                                         | 34.95                             |
|                                                             |                               |                                             |                                   |
| <b>Progression-free survival (p=0.573)</b>                  | <b>Number of Cases, Total</b> | <b>Number of Cases, Relapsed/Progressed</b> | <b>Median Months Disease-free</b> |
| Cases with at least one mRNA upregulation in selected genes | 100                           | 46                                          | 27.83                             |
| Cases without any alterations                               | 211                           | 93                                          | 36.86                             |

**Supplementary table 1 lists the types of mutations found in KDM6A and SWI/SNF complex members found in the RPCCC cohort**

| <b>Gene name</b> | <b>Mutation type</b> | <b>Amino acid change</b>                                                                                    |
|------------------|----------------------|-------------------------------------------------------------------------------------------------------------|
| <b>ACTL6B</b>    | Missense             | p.S200C                                                                                                     |
|                  | Silent               | p.G196G                                                                                                     |
| <b>ARID1A</b>    | Frame_Shift          | p.109_112del, p.G922fs, p.728_734del, p.44_45del, p.G70fs, p.E2033fs, p.N833fs                              |
|                  | Missense             | p.R1966H, p.E1806Q, p.S1001F, p.L1028V, p.P773L, p.P427L, p.E1643D, p.E1739Q, p.A1489D                      |
|                  | Nonsense             | p.Q1493X, p.Q268X, p.Q585X, p.S350X, p.Q479X                                                                |
|                  | Silent               | p.L117L, p.I1485I                                                                                           |
| <b>ARID1B</b>    | In_Frame_Ins         | p.A329delinsGA                                                                                              |
|                  | Nonsense             | p.E1998X                                                                                                    |
| <b>KDM6A</b>     | Frame_Shift          | p.1310_1313del, p.I1020fs, p.799_799del, p.N1150fs, p.A756fs, p.661_663del, p.S238fs, p.T521fs              |
|                  | Missense             | p.T548S, p.E363K, p.G137D, p.F984S, p.Q369R                                                                 |
|                  | Nonsense             | p.S884X, p.K831X, p.R519X, p.Q641X, p.Q677X, p.Q506X, p.R165X, p.Q555X, p.E946X, p.S706X, p.C1358X, p.K395X |
|                  | Silent               | p.L547L, p.E1316E                                                                                           |
|                  | Splice Site          |                                                                                                             |
| <b>SMARCA4</b>   | Intron               |                                                                                                             |
|                  | Missense             | p.E798K                                                                                                     |
|                  | Silent               | p.P805P, p.L773L                                                                                            |
| <b>SMARCC1</b>   | Missense             | p.R955Q, p.E672Q                                                                                            |
|                  | Silent               | p.P541P                                                                                                     |
| <b>SMARCC2</b>   | 3'-UTR               |                                                                                                             |

**Supplementary table 2 Mutations in HT1376, T24 and UM-UC-3 cells**

| <b>Gene name</b> | <b>HT1376</b>                                      | <b>T24</b>                      | <b>UM-UC-3</b>                  |
|------------------|----------------------------------------------------|---------------------------------|---------------------------------|
| ARID1A           | c.557_570del14 (Deletion FS); c.3905C>G (Missense) |                                 |                                 |
| SMARCA4          | c.981A>C (Substitution, coding silent)             |                                 | c.223-2A>G (Unknown)            |
| SMARCD2          | c.642C>G (Missense), c.666C>G (Missense)           |                                 |                                 |
| KDM6A            | c.876-3C>G (Missense)                              | c.2683G>T, c.2704G>T (Nonsense) | c.3887T>G, c.3908T>G (Missense) |

Supplementary Table 3 p-values for all *in vitro* experiments

| HT1376                    |             |  |                 |                |                   |  |                  |
|---------------------------|-------------|--|-----------------|----------------|-------------------|--|------------------|
|                           | Cell counts |  | Cell cycle (G1) | Cell cycle (S) | Cell cycle (G2/M) |  | Clonogenic assay |
| Treatment Comparison      | p-value     |  |                 |                |                   |  |                  |
| Vehicle vs. Cisplatin     | <0.05       |  | <0.0001         | 0.56           | <0.0001           |  | <0.01            |
| Vehicle vs. EPZ           | <0.0001     |  | <0.001          | 0.87           | <0.01             |  | <0.0001          |
| Vehicle vs. Combination   | <0.0001     |  | <0.0001         | 0.05           | <0.01             |  | <0.0001          |
| Cisplatin vs. EPZ         | <0.01       |  | 0.03            | 0.95           | 0.10              |  | <0.01            |
| Cisplatin vs. Combination | <0.01       |  | 0.95            | 0.54           | 0.25              |  | <0.0001          |
| EPZ vs. Combination       | 0.97        |  | <0.05           | 0.25           | 0.97              |  | 0.10             |
| T24                       |             |  |                 |                |                   |  |                  |
|                           | Cell counts |  | Cell cycle (G1) | Cell cycle (S) | Cell cycle (G2/M) |  | Clonogenic assay |
| Treatment Comparison      | p-value     |  |                 |                |                   |  |                  |
| Vehicle vs. Cisplatin     | <0.05       |  | <0.0001         | 0.85           | <0.0001           |  | <0.0001          |
| Vehicle vs. EPZ           | <0.001      |  | <0.001          | 0.75           | 0.75              |  | 0.14             |
| Vehicle vs. Combination   | <0.001      |  | <0.0001         | 0.87           | <0.0001           |  | <0.0001          |
| Cisplatin vs. EPZ         | 0.21        |  | <0.0001         | 0.99           | <0.0001           |  | <0.05            |
| Cisplatin vs. Combination | 0.05        |  | 0.97            | >0.99          | 0.96              |  | 0.59             |
| EPZ vs. Combination       | 0.86        |  | <0.0001         | 0.99           | <0.0001           |  | <0.05            |
| UM-UC-3                   |             |  |                 |                |                   |  |                  |
|                           | Cell counts |  | Cell cycle (G1) | Cell cycle (S) | Cell cycle (G2/M) |  | Clonogenic assay |
| Treatment Comparison      | p-value     |  |                 |                |                   |  |                  |
| Vehicle vs. Cisplatin     | 0.20        |  | <0.0001         | <0.01          | <0.0001           |  | <0.0001          |
| Vehicle vs. EPZ           | <0.001      |  | <0.05           | <0.05          | 0.85              |  | <0.05            |
| Vehicle vs. Combination   | <0.0001     |  | <0.0001         | 0.93           | <0.0001           |  | <0.0001          |
| Cisplatin vs. EPZ         | <0.05       |  | <0.001          | 0.92           | <0.001            |  | <0.01            |
| Cisplatin vs. Combination | <0.05       |  | <0.05           | 0.06           | 0.92              |  | <0.05            |
| EPZ vs. Combination       | 0.68        |  | <0.0001         | <0.05          | <0.001            |  | <0.001           |

**Supplementary Table 4 p-values for *in vivo* xenograft experiment**

| <b>Treatment Comparison</b> | <b>Tumor growth curve</b> | <b>End of study tumor volume</b> | <b>End of study tumor weight</b> |
|-----------------------------|---------------------------|----------------------------------|----------------------------------|
| Vehicle vs. CDDP            | 0.66                      | 0.99                             | 0.28                             |
| Vehicle vs. EPZ             | 0.13                      | 0.25                             | 0.23                             |
| Vehicle vs. EPZ+CDDP        | <0.05                     | <0.05                            | <0.05                            |
| Cisplatin vs. EPZ           | 0.27                      | 0.24                             | 0.69                             |
| Cisplatin vs. EPZ+CDDP      | 0.05                      | <0.05                            | <0.05                            |
| EPZ vs. EPZ+CDDP            | 0.38                      | 0.18                             | 0.27                             |

| <b>p-values for Ki67 level comparison</b> |                |
|-------------------------------------------|----------------|
| <b>Treatment Comparison</b>               | <b>p-value</b> |
| Vehicle vs. CDDP                          | <0.05          |
| Vehicle vs. EPZ                           | <0.0001        |
| Vehicle vs. EPZ+CDDP                      | 0.7787         |
| Cisplatin vs. EPZ                         | <0.0001        |
| Cisplatin vs. EPZ+CDDP                    | 0.1047         |
| EPZ vs. EPZ+CDDP                          | <0.0001        |

| <b>p-values for for H3K27me3 level comparison</b> |                |
|---------------------------------------------------|----------------|
| <b>Treatment Comparison</b>                       | <b>p-value</b> |
| Vehicle vs. CDDP                                  | 0.91           |
| Vehicle vs. EPZ                                   | <0.01          |
| Vehicle vs. EPZ+CDDP                              | <.001          |
| Cisplatin vs. EPZ                                 | <.001          |
| Cisplatin vs. EPZ+CDDP                            | <.001          |
| EPZ vs. EPZ+CDDP                                  | 0.72           |

| <b>p-values for for CD56 level comparison</b> |                |
|-----------------------------------------------|----------------|
| <b>Treatment Comparison</b>                   | <b>p-value</b> |
| Vehicle vs. CDDP                              | <0.05          |
| Vehicle vs. EPZ                               | 0.9038         |
| Vehicle vs. EPZ+CDDP                          | <0.01          |
| Cisplatin vs. EPZ                             | <0.05          |
| Cisplatin vs. EPZ+CDDP                        | <0.05          |
| EPZ vs. EPZ+CDDP                              | <0.0001        |

| <b>p-values for for NCR1 level comparison</b> |                |
|-----------------------------------------------|----------------|
| <b>Treatment Comparison</b>                   | <b>p-value</b> |
| Vehicle vs. CDDP                              | <0.01          |
| Vehicle vs. EPZ                               | <0.01          |
| Vehicle vs. EPZ+CDDP                          | <0.05          |
| Cisplatin vs. EPZ                             | <0.001         |
| Cisplatin vs. EPZ+CDDP                        | <0.01          |
| EPZ vs. EPZ+CDDP                              | 0.28           |

**Supplementary table 5** EZH2 inhibition mediated upregulated transcripts single agent EPZ011989 and combination treated HT1376 xenografts *in vivo*

|    | <b>Gene name</b>                 | <b>Log2FC</b> |
|----|----------------------------------|---------------|
| 1  | IFN-gamma                        | 6.91          |
| 2  | MHC class II                     | 6.41          |
| 3  | MIG                              | 6.34          |
| 4  | MIP-1-beta                       | 5.86          |
| 5  | CCL3L1                           | 5.83          |
| 6  | HLA-DQA1                         | 5.54          |
| 7  | G-protein beta/gamma             | 5.27          |
| 8  | CD137(TNFRSF9)                   | 5.25          |
| 9  | MIP-1-alpha                      | 5.15          |
| 10 | PKC-theta                        | 5.11          |
| 11 | ICAM2                            | 5.07          |
| 12 | Collagen VI                      | 5.05          |
| 13 | CD3                              | 4.99          |
| 14 | TFPI-2                           | 4.94          |
| 15 | HLA-DPB1                         | 4.92          |
| 16 | MHC class II beta chain          | 4.92          |
| 17 | HLA-DRB1                         | 4.90          |
| 18 | Amphiregulin                     | 4.88          |
| 19 | HLA-DPA1                         | 4.85          |
| 20 | CCL22                            | 4.75          |
| 21 | CD74                             | 4.73          |
| 22 | CEACAM1                          | 4.72          |
| 23 | ITK                              | 4.58          |
| 24 | Galpha(q)-specific peptide GPCRs | 4.56          |
| 25 | CD21                             | 4.54          |
| 26 | IL-7 receptor                    | 4.51          |
| 27 | IL7RA                            | 4.51          |
| 28 | G-protein alpha-i family         | 4.46          |
| 29 | HLA-DQB1                         | 4.46          |
| 30 | HLA-DRA1                         | 4.45          |
| 31 | CSF1                             | 4.38          |
| 32 | PECAM1                           | 4.37          |
| 33 | alpha-M/beta-2 integrin          | 4.27          |
| 34 | ITGB2                            | 4.27          |
| 35 | IL-2R gamma chain                | 4.23          |
| 36 | IL-15 receptor                   | 4.23          |
| 37 | IL-2 receptor                    | 4.23          |
| 38 | IL-21 receptor                   | 4.23          |
| 39 | IL-21 receptor                   | 4.23          |
| 40 | HLA-DMB                          | 4.08          |
| 41 | CCL5                             | 3.96          |



|    |                          |      |
|----|--------------------------|------|
| 42 | ENA-78                   | 3.89 |
| 43 | GCP2                     | 3.89 |
| 44 | GRO-1                    | 3.87 |
| 45 | IP10                     | 3.87 |
| 46 | HLA-DOA                  | 3.87 |
| 47 | G-CSF                    | 3.82 |
| 48 | IL-5                     | 3.81 |
| 49 | IL-24                    | 3.74 |
| 50 | CD244                    | 3.69 |
| 51 | NKG2A                    | 3.69 |
| 52 | IL-31RA                  | 3.62 |
| 53 | IL-35                    | 3.52 |
| 54 | IL-12 alpha              | 3.52 |
| 55 | IL-2R alpha chain        | 3.51 |
| 56 | IL23A                    | 3.49 |
| 57 | HLA-DMA                  | 3.49 |
| 58 | CD33                     | 3.44 |
| 59 | TNF-beta                 | 3.35 |
| 60 | SHPS-1                   | 3.30 |
| 61 | IL-12RB1                 | 3.28 |
| 62 | Cathepsin S              | 3.25 |
| 63 | I-TAC                    | 3.25 |
| 64 | LAIR1                    | 3.24 |
| 65 | VCAM1                    | 3.18 |
| 66 | CFTR                     | 3.14 |
| 67 | IL-6                     | 3.14 |
| 68 | CD5                      | 3.13 |
| 69 | C1s                      | 3.10 |
| 70 | CD3 epsilon              | 3.06 |
| 71 | PTX3                     | 3.05 |
| 72 | EBI3                     | 3.05 |
| 73 | ROR-alpha                | 2.98 |
| 74 | IL-20                    | 2.93 |
| 75 | Tubulin alpha            | 2.91 |
| 76 | HLA-F                    | 2.85 |
| 77 | PI3K reg class IB (p101) | 2.85 |
| 78 | ICAM1                    | 2.82 |
| 79 | HLA-B                    | 2.79 |
| 80 | IGF-1                    | 2.79 |
| 81 | MMP-13                   | 2.77 |
| 82 | LIF                      | 2.76 |
| 83 | TGF-beta                 | 2.75 |
| 84 | IL-11                    | 2.71 |
| 85 | PLC-gamma                | 2.71 |
| 86 | PKC-alpha                | 2.70 |
| 87 | CIITA                    | 2.65 |
| 88 | SDF-1                    | 2.59 |

|     |                                |      |
|-----|--------------------------------|------|
| 89  | Alpha-actinin                  | 2.58 |
| 90  | CD86                           | 2.57 |
| 91  | CD86                           | 2.57 |
| 92  | ESAM                           | 2.57 |
| 93  | TR2(TNFRSF14)                  | 2.49 |
| 94  | MMP-9                          | 2.47 |
| 95  | ITGAL                          | 2.46 |
| 96  | DDR2                           | 2.44 |
| 97  | FCGR3A                         | 2.41 |
| 98  | PSMB9                          | 2.39 |
| 99  | Rac2                           | 2.39 |
| 100 | MASP1                          | 2.38 |
| 101 | C1r                            | 2.36 |
| 102 | GM-CSF                         | 2.35 |
| 103 | TNF-alpha                      | 2.31 |
| 104 | HLA-C                          | 2.29 |
| 105 | SOCS2                          | 2.22 |
| 106 | CCR4                           | 2.21 |
| 107 | L-selectin                     | 2.21 |
| 108 | BAFF(TNFSF13B)                 | 2.21 |
| 109 | IL-15RA                        | 2.19 |
| 110 | PLAUR (uPAR)                   | 2.17 |
| 111 | TNF-R2                         | 2.17 |
| 112 | TL1A(TNFSF15)                  | 2.16 |
| 113 | CCL17                          | 2.13 |
| 114 | C1qRp                          | 2.08 |
| 115 | HLA-H                          | 2.08 |
| 116 | DPP4                           | 2.06 |
| 117 | CX3CL1                         | 2.04 |
| 118 | C3                             | 2.03 |
| 119 | C5 convertase (C3b2Bb)         | 2.03 |
| 120 | iC3b                           | 2.03 |
| 121 | HLA-A                          | 2.01 |
| 122 | SERPINE2                       | 2.00 |
| 123 | TAP1 (PSF1)                    | 2.00 |
| 124 | RANK(TNFRSF11A)                | 1.98 |
| 125 | CD70(TNFSF7)                   | 1.95 |
| 126 | CD70(TNFSF7)                   | 1.95 |
| 127 | C5L2                           | 1.95 |
| 128 | PD-L1                          | 1.94 |
| 129 | MAGI-1(BAIAP1)                 | 1.92 |
| 130 | PD-L2                          | 1.92 |
| 131 | IL-7                           | 1.88 |
| 132 | IL-2R beta chain               | 1.87 |
| 133 | PAI2                           | 1.86 |
| 134 | C1 inhibitor                   | 1.85 |
| 135 | PI3K cat class IB (p110-gamma) | 1.84 |

|     |                      |      |
|-----|----------------------|------|
| 136 | SOCS3                | 1.84 |
| 137 | STAT5                | 1.83 |
| 138 | STAT5A               | 1.83 |
| 139 | Serglycin            | 1.80 |
| 140 | ITGAX                | 1.79 |
| 141 | PAK1                 | 1.79 |
| 142 | CD137 ligand(TNFSF9) | 1.77 |
| 143 | DDR1                 | 1.77 |
| 144 | Galectin-9           | 1.75 |
| 145 | CCL20                | 1.72 |
| 146 | CCL20                | 1.72 |
| 147 | Syk                  | 1.71 |
| 148 | CXCL16               | 1.71 |
| 149 | IL-8                 | 1.70 |
| 150 | Talin                | 1.70 |
| 151 | Factor B             | 1.67 |
| 152 | ICOS-L               | 1.66 |
| 153 | C4                   | 1.63 |
| 154 | NF-AT1(NFATC2)       | 1.60 |
| 155 | PSMD3                | 1.59 |
| 156 | ITGAM                | 1.58 |
| 157 | LIGHT(TNFSF14)       | 1.58 |
| 158 | ULBP2                | 1.54 |

**Supplementary table 6** EZH2 inhibition mediated upregulated transcripts in HT1376 cells *in vitro*

|    | <b>Gene name</b>                 | <b>Log2FC</b> |
|----|----------------------------------|---------------|
| 1  | PRKCI                            | 5.47          |
| 2  | Cyclin D2                        | 5.42          |
| 3  | CD30(TNFRSF8)                    | 5.03          |
| 4  | PECAM1                           | 4.78          |
| 5  | G-protein alpha-i family         | 4.41          |
| 6  | MHC class II                     | 4.41          |
| 7  | G-protein beta/gamma             | 3.49          |
| 8  | IL20RA                           | 3.11          |
| 9  | GRO-1                            | 3.10          |
| 10 | GRO-2                            | 3.10          |
| 11 | cPKC (conventional)              | 2.98          |
| 12 | PKC-alpha                        | 2.98          |
| 13 | TIM-1                            | 2.96          |
| 14 | EBI3                             | 2.91          |
| 15 | MMP-13                           | 2.89          |
| 16 | Ephrin-B receptor 1              | 2.89          |
| 17 | Stromelysin-1                    | 2.73          |
| 18 | TIM-3                            | 2.68          |
| 19 | TLR2                             | 2.65          |
| 20 | Nectin-3                         | 2.64          |
| 21 | TRAF5                            | 2.59          |
| 22 | PIP5KI                           | 2.59          |
| 23 | IP10                             | 2.58          |
| 24 | IL7RA                            | 2.58          |
| 25 | CCL3L1                           | 2.53          |
| 26 | PLC-gamma                        | 2.49          |
| 27 | PLC-gamma 2                      | 2.49          |
| 28 | PI3K cat class IB (p110-gamma)   | 2.48          |
| 29 | Collagen V                       | 2.39          |
| 30 | MMP-9                            | 2.36          |
| 31 | CD137(TNFRSF9)                   | 2.36          |
| 32 | CD137 ligand(TNFSF9)             | 2.10          |
| 33 | Histamine H1 receptor            | 2.10          |
| 34 | CaMK II beta                     | 2.10          |
| 35 | Tubulin (in microtubules)        | 1.95          |
| 36 | Tubulin beta                     | 1.95          |
| 37 | PI3K reg class IA                | 1.89          |
| 38 | Rac2                             | 1.85          |
| 39 | Galpha(q)-specific peptide GPCRs | 1.84          |
| 40 | ARAP3                            | 1.82          |

|    |                |      |
|----|----------------|------|
| 41 | IL-8           | 1.68 |
| 42 | Tubulin alpha  | 1.67 |
| 43 | TR2(TNFRSF14)  | 1.64 |
| 44 | CD70(TNFSF7)   | 1.61 |
| 45 | IP3 receptor   | 1.60 |
| 46 | ICOS-L         | 1.55 |
| 47 | ENA-78         | 1.49 |
| 48 | GCP2           | 1.49 |
| 49 | Talin          | 1.48 |
| 50 | TLN2           | 1.48 |
| 51 | Actin          | 1.46 |
| 52 | CCL5           | 1.38 |
| 53 | SLAP-130(ADAP) | 1.36 |
| 54 | IL-24          | 1.33 |
| 55 | NF-AT2(NFATC1) | 1.28 |
| 56 | IL27RA         | 1.23 |
| 57 | MLCK           | 1.20 |
| 58 | MYLK1          | 1.20 |

**Supplementary table 7** EZH2 inhibition mediated upregulated transcripts in T24 cells *in vitro*

|   | <b>Gene name</b>         | <b>Log2FC</b> |
|---|--------------------------|---------------|
| 1 | GUCY1A2                  | 2.15          |
| 2 | PKA-reg (cAMP-dependent) | 1.94          |
| 3 | NF-AT                    | 1.52          |
| 4 | PLC-beta                 | 1.47          |
| 5 | p67-phox                 | 1.29          |

**Supplementary table 8** EZH2 inhibition mediated  
common upregulated transcripts in HT1376 and T24  
cells *in vitro*

|   | <b>Gene name</b>         | <b>HT log2FC</b> | <b>T24 log2FC</b> |
|---|--------------------------|------------------|-------------------|
| 1 | NF-AT1(NFATC2)           | 4.75             | 2.35              |
| 2 | MMP-1                    | 3.57             | 2.65              |
| 3 | Thy-1                    | 2.93             | 2.26              |
| 4 | I-TAC                    | 2.51             | 2.36              |
| 5 | G-protein alpha-i family | 2.09             | 2.16              |
| 6 | CXCR4                    | 2.00             | 1.25              |
| 7 | BFL1                     | 1.98             | 2.14              |
| 8 | P2Y1                     | 1.59             | 1.47              |

**Supplementary table 9** EZH2 inhibition mediated common upregulated transcripts in HT1376 *in vitro* and HT1376 xenografts *in vivo*

|    |                                  |
|----|----------------------------------|
| 1  | ASK1 (MAP3K5)                    |
| 2  | BFL1                             |
| 3  | CaIDAG-GEFII                     |
| 4  | CARD11                           |
| 5  | CCL3L1                           |
| 6  | CCL5                             |
| 7  | CD137 ligand(TNFSF9)             |
| 10 | CD137(TNFRSF9)                   |
| 11 | CD30(TNFRSF8)                    |
| 12 | CD70(TNFSF7)                     |
| 13 | EBI3                             |
| 14 | ENA-78                           |
| 15 | Galpha(q)-specific peptide GPCRs |
| 16 | GCP2                             |
| 17 | G-protein alpha-i family         |
| 18 | G-protein beta/gamma             |
| 19 | GRO-1                            |
| 20 | GRO-2                            |
| 21 | ICOS-L                           |
| 23 | IL-24                            |
| 24 | IL27RA                           |
| 25 | IL7RA                            |
| 26 | IL-8                             |
| 27 | IP10                             |
| 28 | I-TAC                            |
| 29 | MHC class II                     |
| 31 | MICB                             |
| 32 | NF-AT                            |
| 33 | NF-AT1(NFATC2)                   |
| 34 | PI3K cat class IA                |
| 36 | PI3K cat class IA (p110-delta)   |
| 37 | PI3K cat class IB (p110-gamma)   |
| 41 | PKC-alpha                        |
| 42 | PKC-theta                        |
| 43 | PKC-theta                        |
| 44 | PLC-gamma                        |
| 46 | Rac2                             |
| 47 | RANK(TNFRSF11A)                  |
| 48 | SLAP-130(ADAP)                   |
| 50 | Talin                            |
| 51 | TNF-alpha                        |



|    |               |
|----|---------------|
| 53 | TR2(TNFRSF14) |
| 54 | TRAF1         |
| 55 | Tubulin alpha |
